# Supplementary material for: A dendrite-free zinc anode for rechargeable aqueous batteries
Source: Royal Society of Chemistry journal article supplement (doi:10.1039/d0ta07348b), 2020-01-01
Supplement: d0ta07348b1.pdf [file d0ta07348b1.pdf]

## Supporting Information

### **A dendrite-free zinc anode for rechargeable aqueous batteries**

Q.P. Jian <sup>a,b</sup>, Y.H. Wan <sup>a,b</sup>, J. Sun <sup>a,b</sup>, M.C. Wu <sup>a,b,\*</sup>, T.S. Zhao <sup>a,b,\*\*</sup>

<sup>a</sup> HKUST Energy Institute, The Hong Kong University of Science and Technology,  
Clear Water Bay, Kowloon, Hong Kong SAR, China

<sup>b</sup> Department of Mechanical and Aerospace Engineering, The Hong Kong University  
of Science and Technology, Clear Water Bay, Kowloon, Hong Kong SAR, China

---

\* Corresponding author. E-mail: [wmuah@connect.ust.hk](mailto:wmuah@connect.ust.hk) (M.C. Wu).

\*\* Corresponding author. E-mail: [metzhao@ust.hk](mailto:metzhao@ust.hk) (T.S. Zhao).

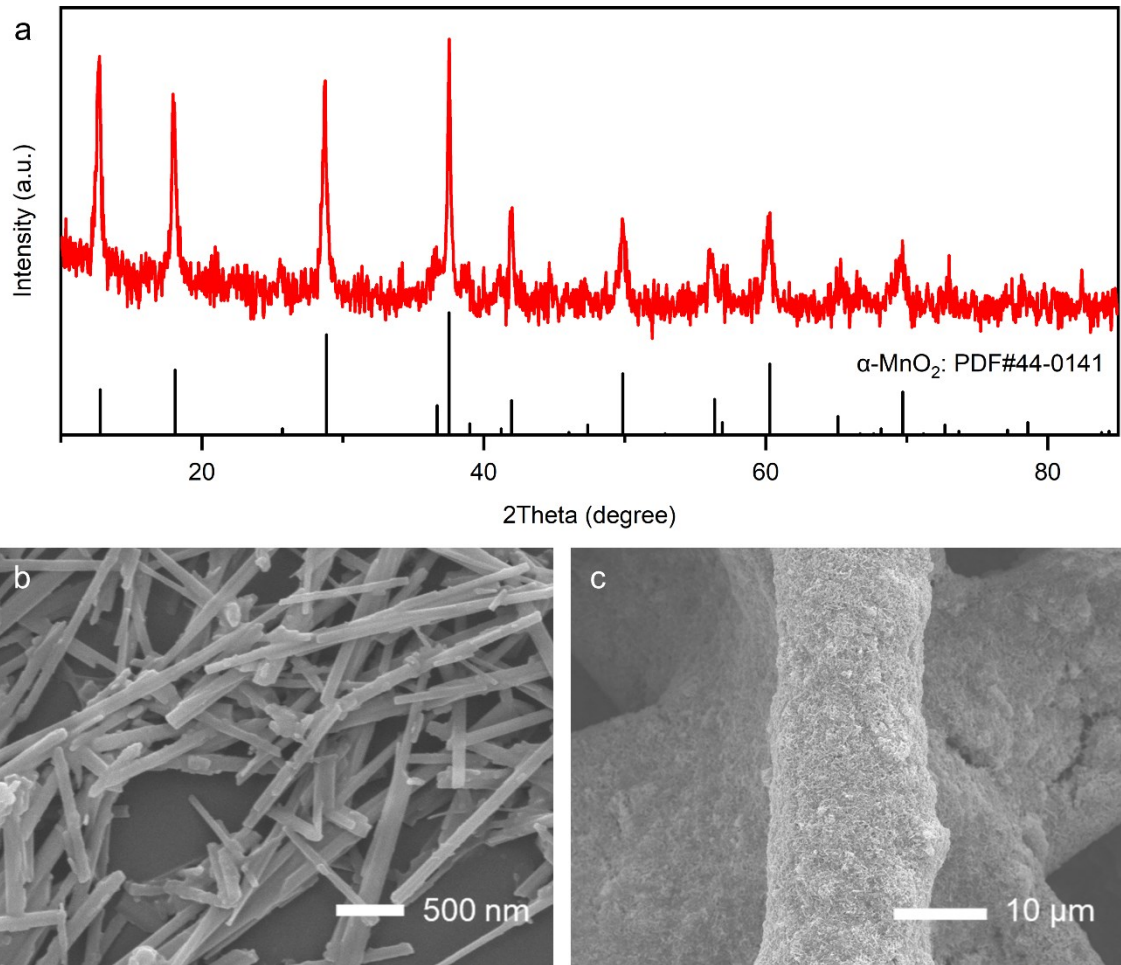

Fig. S1 (a) SEM image of MnO<sub>2</sub> nanorods. (b) SEM image of MnO<sub>2</sub> cathode by coating MnO<sub>2</sub> on carbon paper. (c) XRD pattern of MnO<sub>2</sub> nanorods.

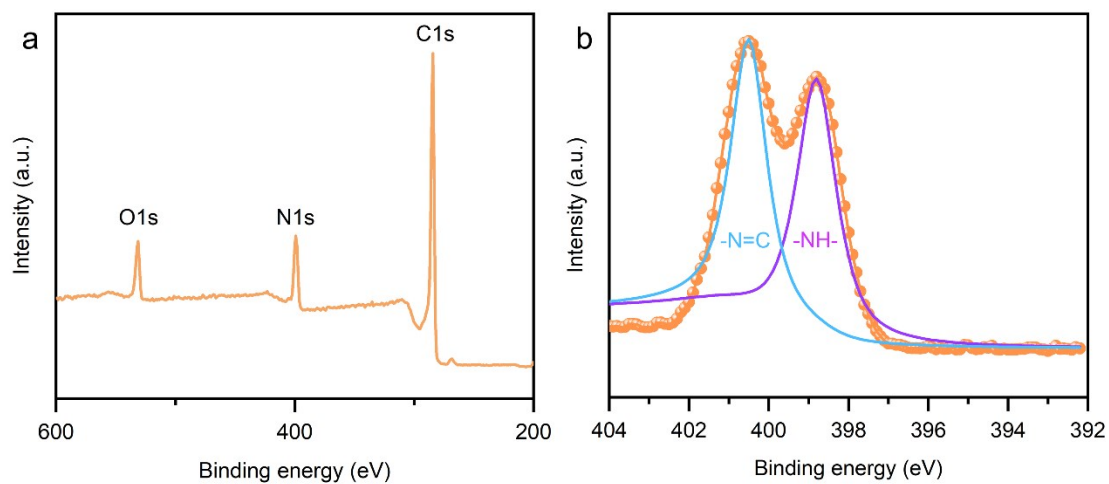

Fig. S2 (a) XPS survey spectra for PBI nanofibers. (b) N 1s XPS spectra of PBI nanofibers on Cu substrate.

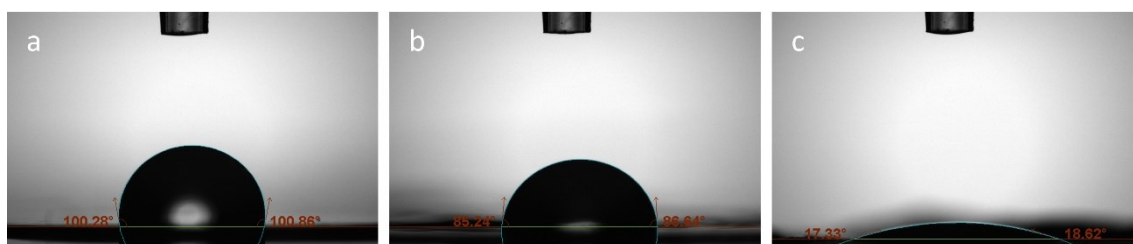

Fig. S3 Contact angle measurements of water drop on (a) Zn foil (about 100°), (b) Cu foil (about 85°) and (c) PBI Cu (about 18°).

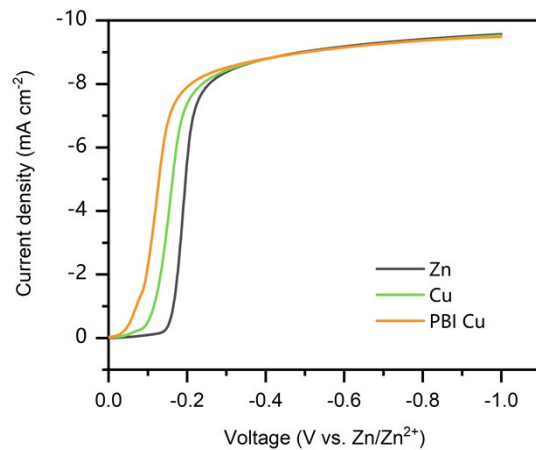

Fig. S4 LSV curves of different electrode in 1M ZnSO<sub>4</sub> electrolyte at a scan rate of 1 mV/s versus Zn metal.

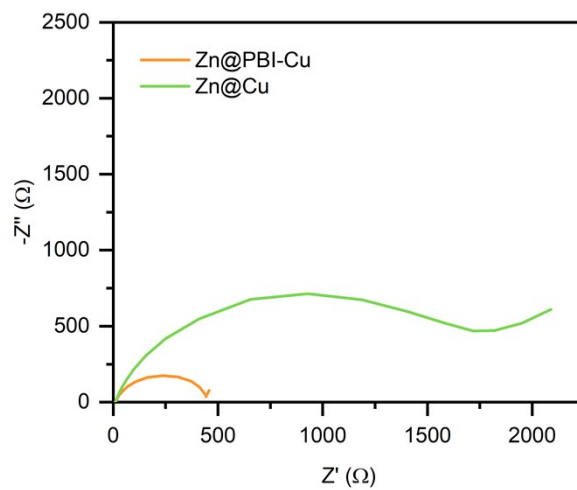

Fig. S5 Nyquist plots of symmetrical cells for the Zn@PBI-Cu and Zn@Cu at room temperature (25 °C).

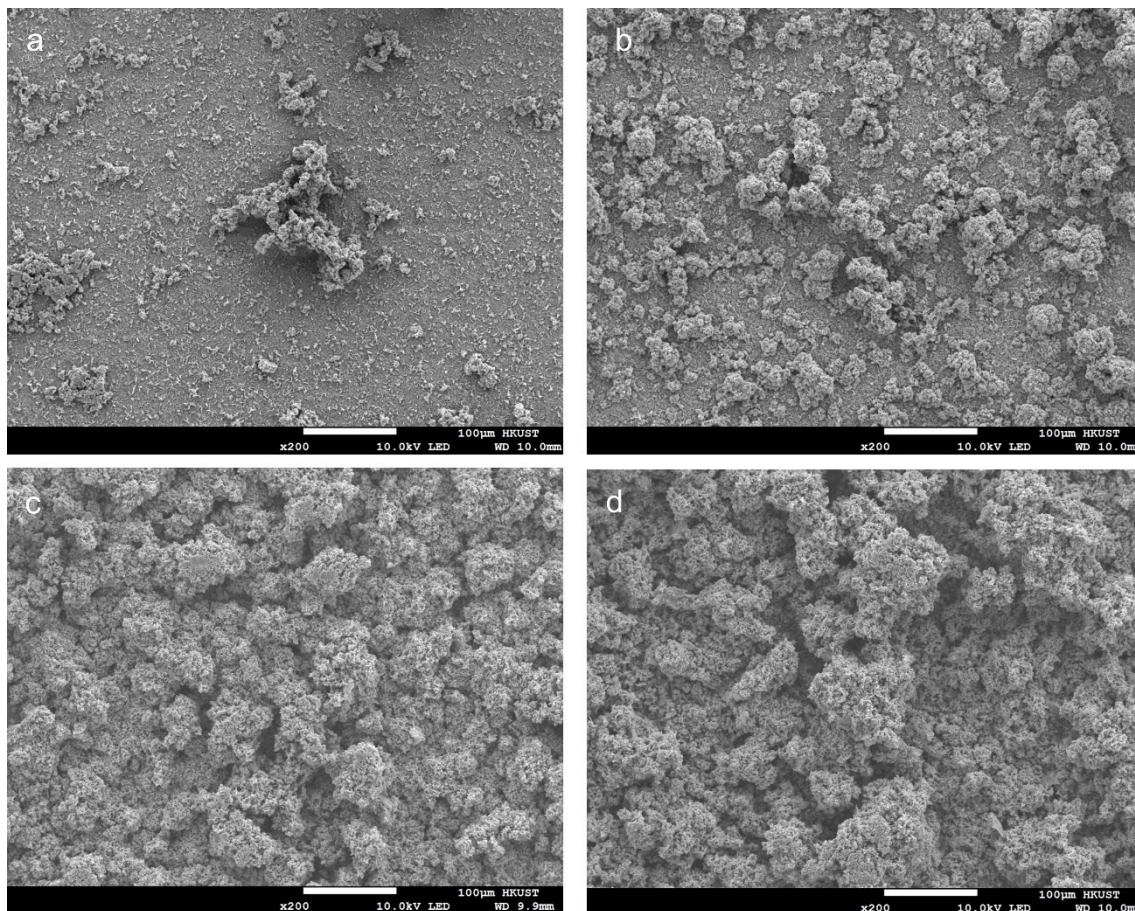

Figure S6. Morphology of Zn deposited on bare Cu with an areal capacity of (a)  $1 \text{ mAh cm}^{-2}$ , (b)  $2 \text{ mAh cm}^{-2}$ , (c)  $5 \text{ mAh cm}^{-2}$ , (d)  $10 \text{ mAh cm}^{-2}$ .



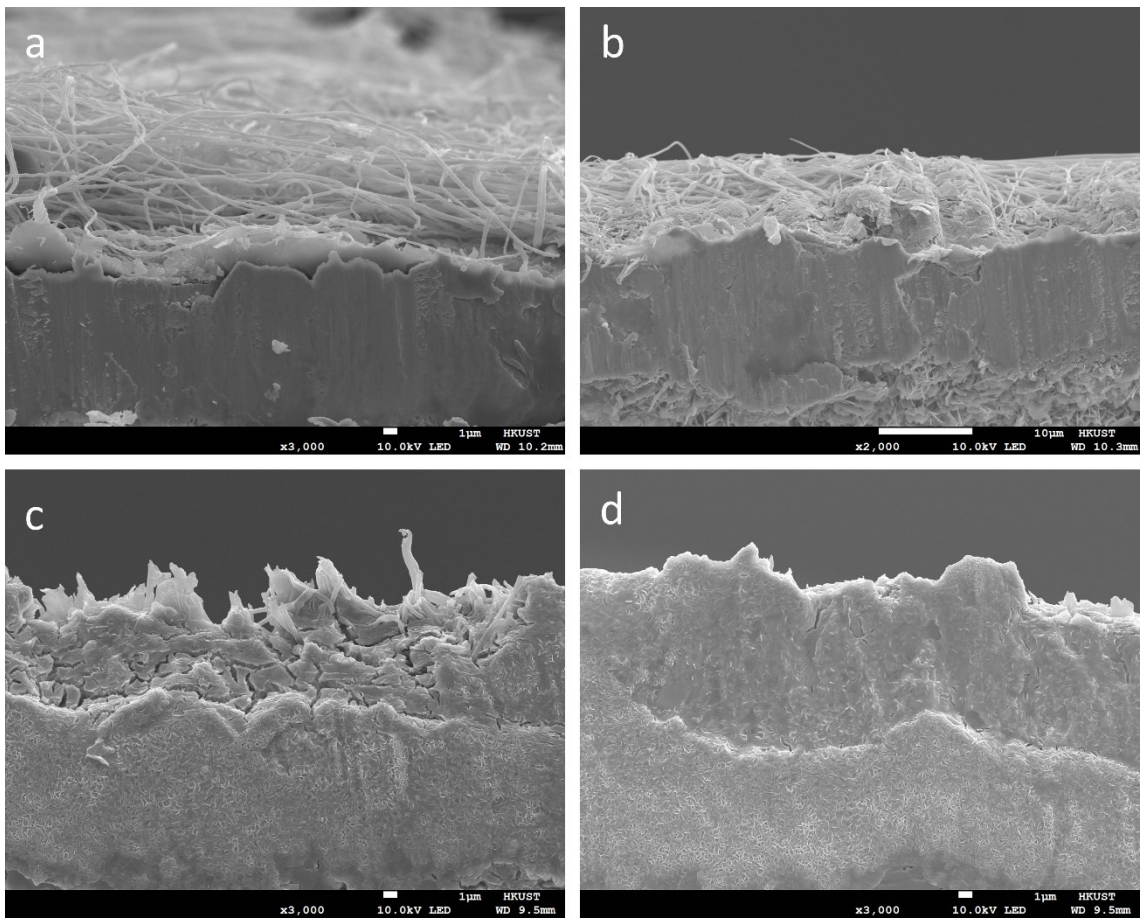

Figure S7. Morphology of Zn deposited on PBI-Cu (cross section) with an areal capacity of (a) 1 mAh cm<sup>-2</sup>, (b) 2 mAh cm<sup>-2</sup>, (c) 5 mAh cm<sup>-2</sup>, (d) 10 mAh cm<sup>-2</sup>.

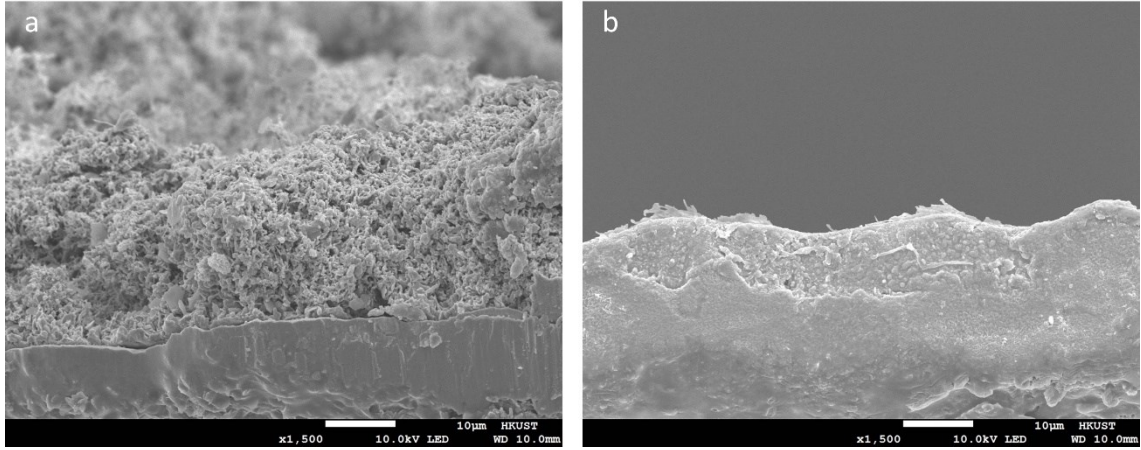

Figure S8. Cross-section image of 10 mAh Zn metal deposited on (a) bare Cu with porous and nonuniform distribution, (b) on PBI Cu with dense and uniform distribution in the PBI framework.

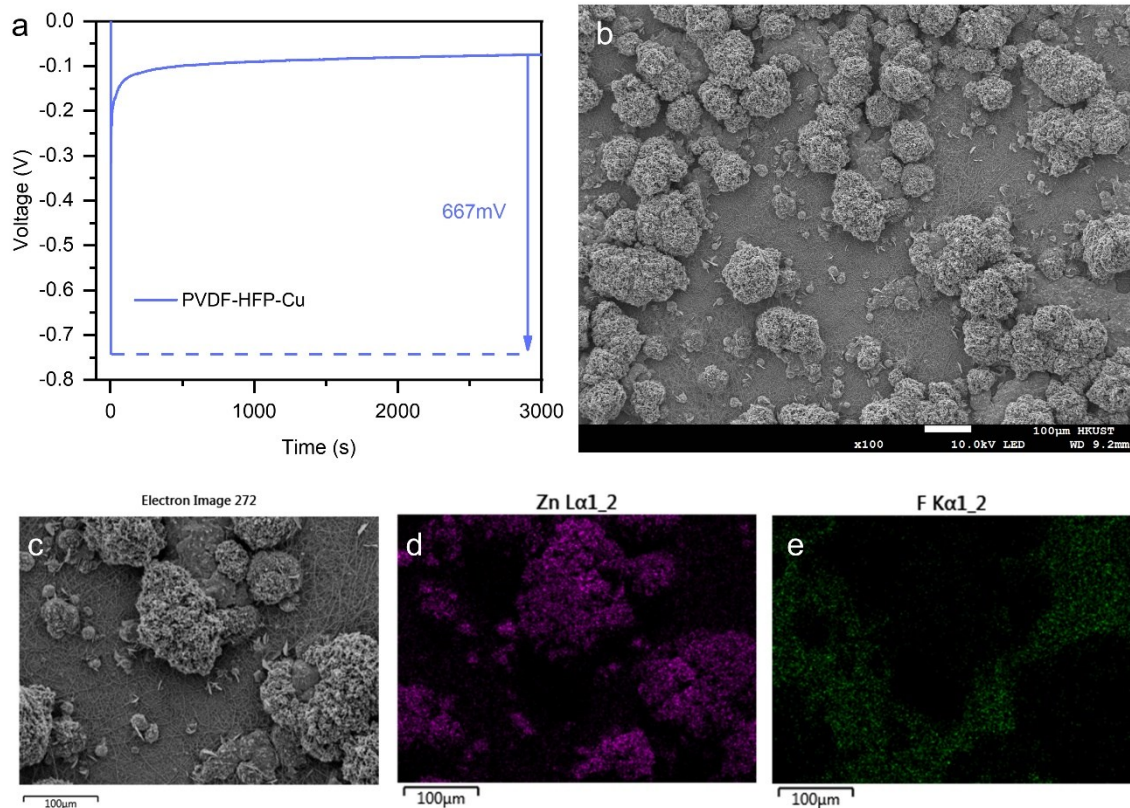

Figure S9. Optical microscope image of 10 mAh Zn metal deposited on PVDF-HFP Cu with different magnification.



Table S1. The fitting resistance results of symmetric cells for PBI Cu and bare Cu by the equivalent circuit at different temperatures.

| Symmetric cell | Resistance ( $\Omega$ ) | 25 °C ( $\Omega$ ) | 35 °C ( $\Omega$ ) | 40 °C ( $\Omega$ ) | 45 °C ( $\Omega$ ) | 55 °C ( $\Omega$ ) |
|----------------|-------------------------|--------------------|--------------------|--------------------|--------------------|--------------------|
| PBI Cu         | $R_{ct}$                | 1986.4             | 1399.6             | 1149.8             | 963.8              | 689.1              |
|                | $R_s$                   | 6.8                | 7.5                | 8.1                | 8.6                | 9.9                |
| Cu             | $R_{ct}$                | 457.9              | 353.5              | 316.6              | 283.49             | 218.2              |
|                | $R_s$                   | 7.1                | 8.2                | 8.6                | 9.3                | 12.2               |
